# Supplementary material
Source: PubMed Central journal article supplement (PMC5319896)

Supplementary Figure 1

Effects of ancestry informative SNPs, rs3136790, rs6474387, rs2272733, and rs10096210, on *POLB* gene expression.

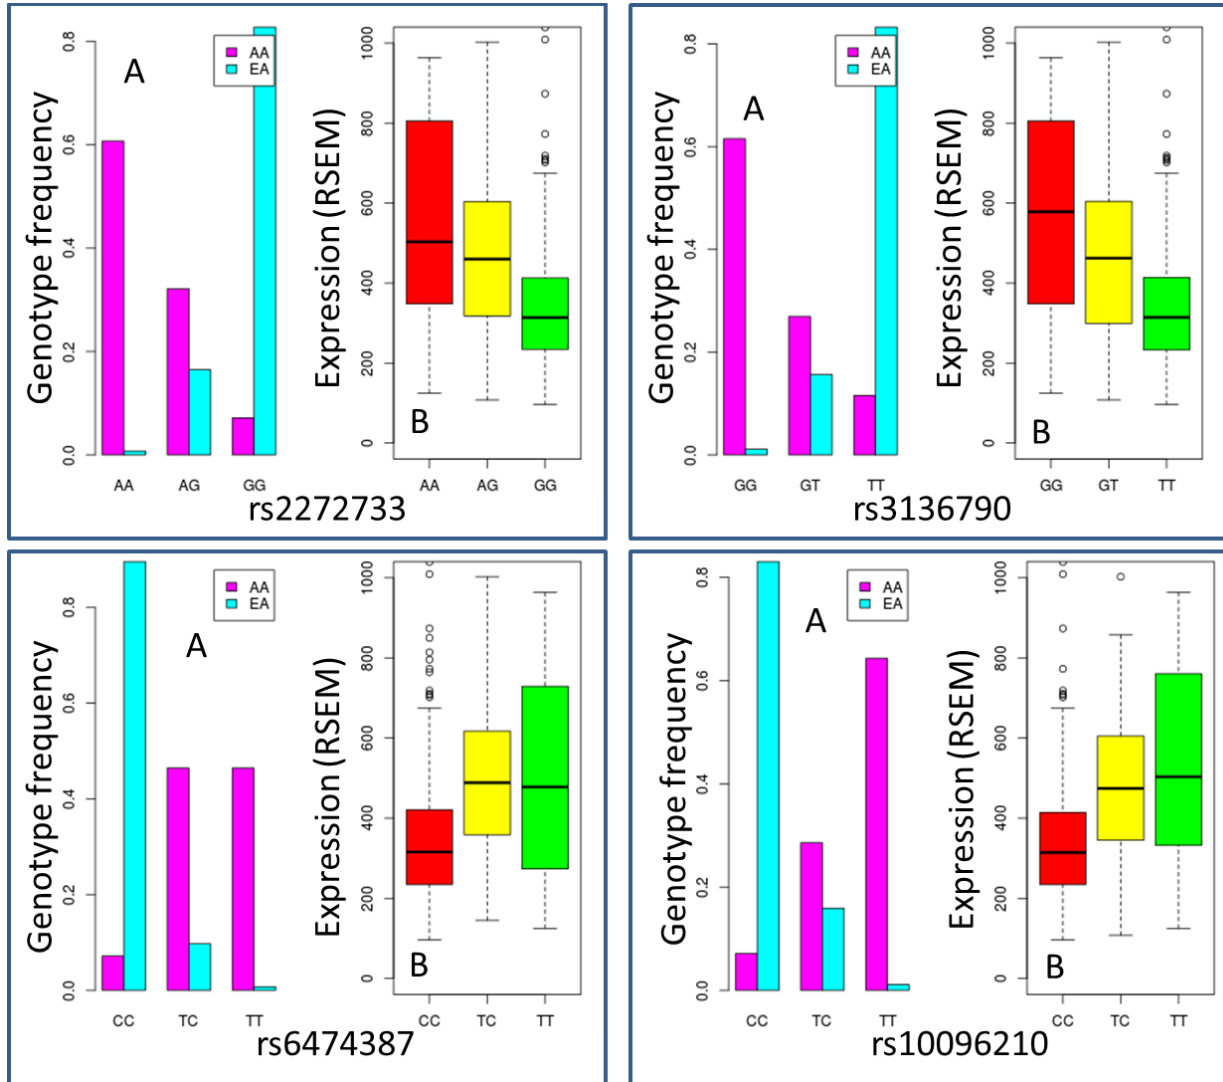

Supplement: NIHMS827555-supplement-Supp_Fig_S1.pdf [file NIHMS827555-supplement-Supp_Fig_S1.pdf]
