# Supplementary material
Source: PubMed Central journal article supplement (PMC5319896)

Supplementary Figure 2

Kaplan-Meier (KM) plot on overall survival of HNSCC patients (N=157) with platinum-based chemo and/or radiation therapy

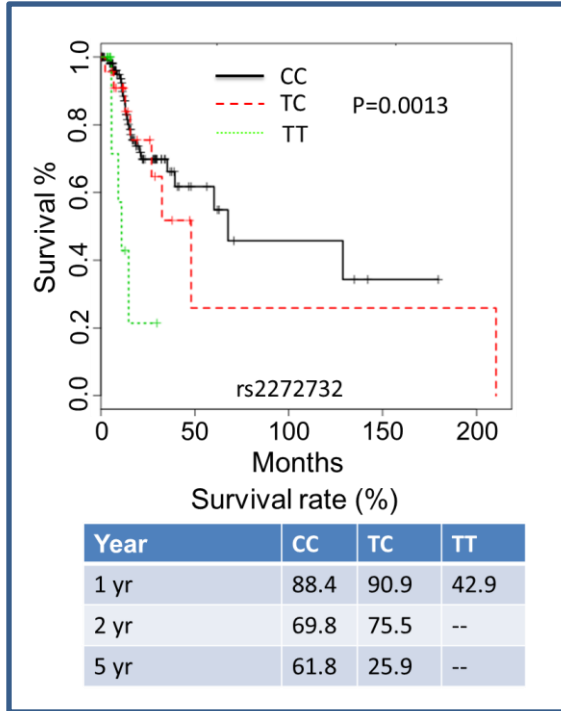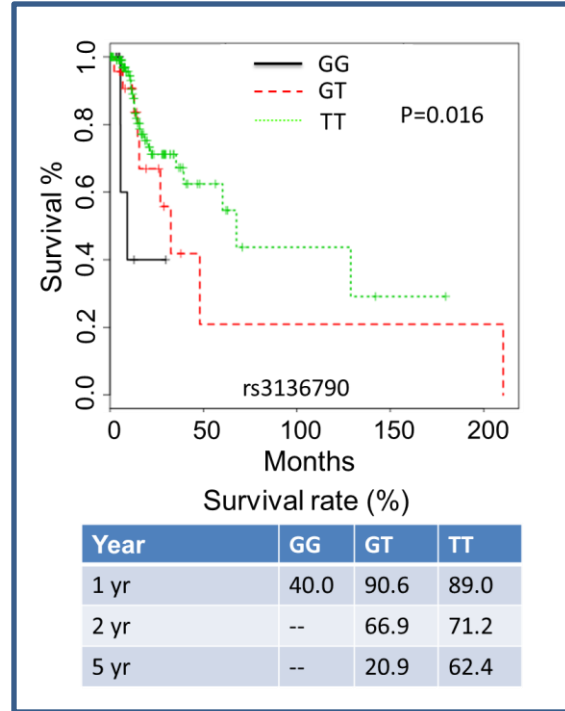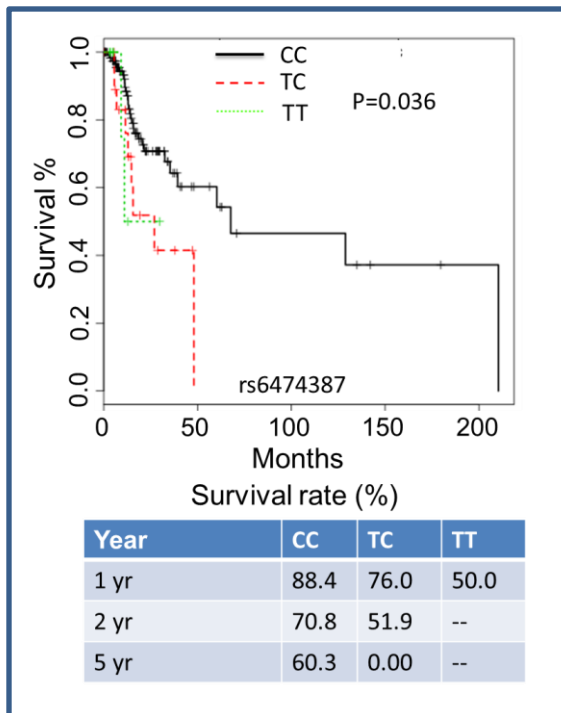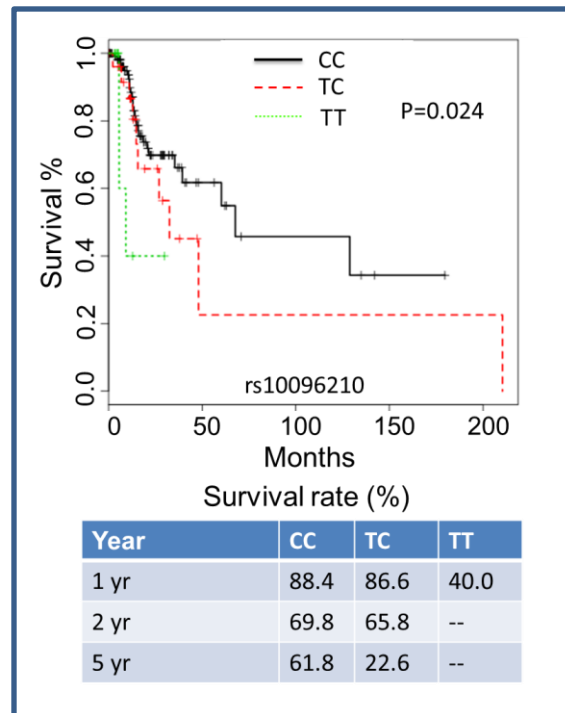

Supplement: NIHMS827555-supplement-Supp_Fig_S2.pdf [file NIHMS827555-supplement-Supp_Fig_S2.pdf]
