# Supplementary material
Source: PubMed Central journal article supplement (PMC5319896)

Supplementary Figure 3

Kaplan-Meier (KM) plot on disease-free survival of HNSCC patients with platinum-based chemo and/or radiation therapy

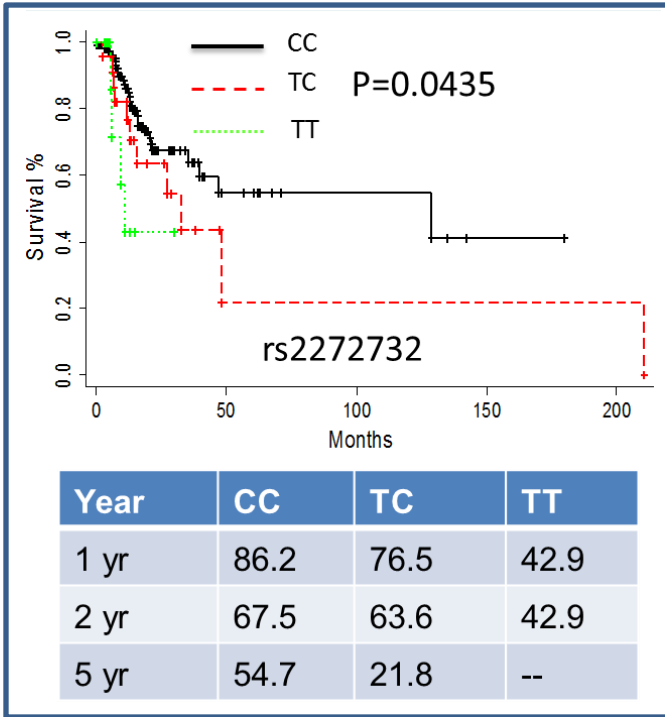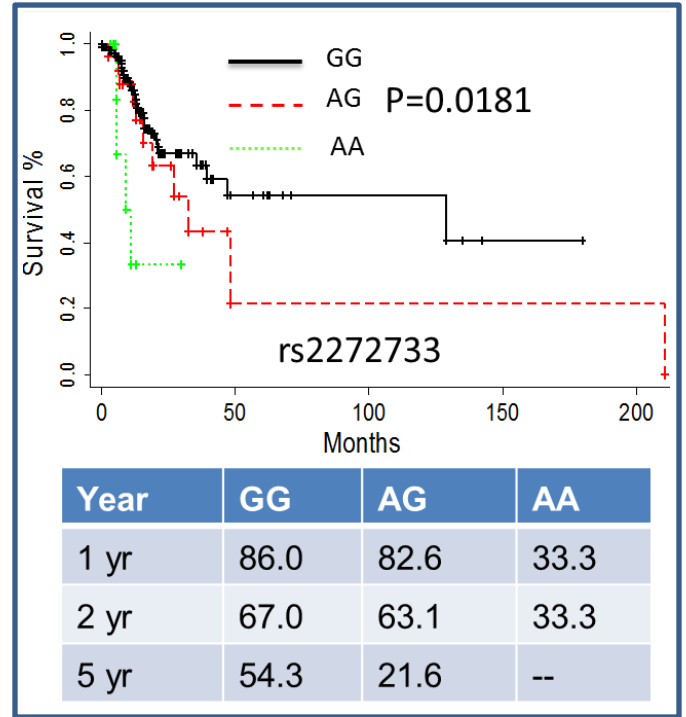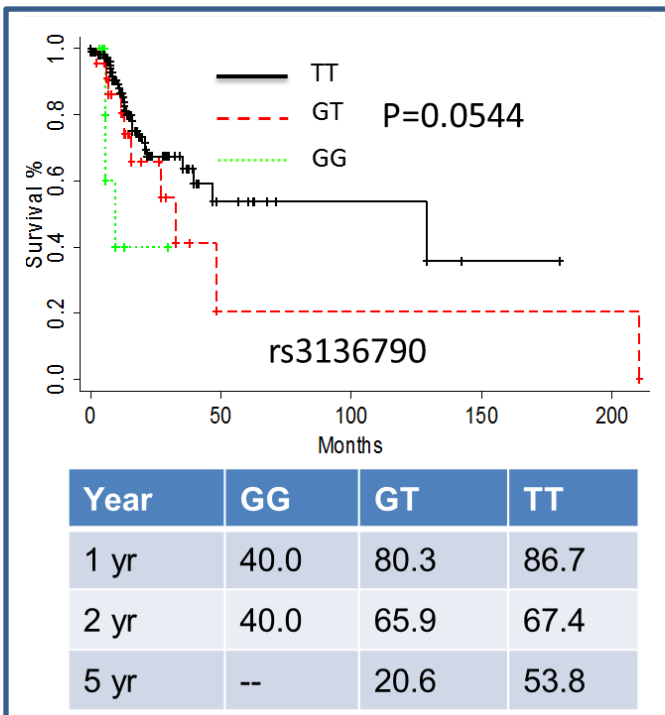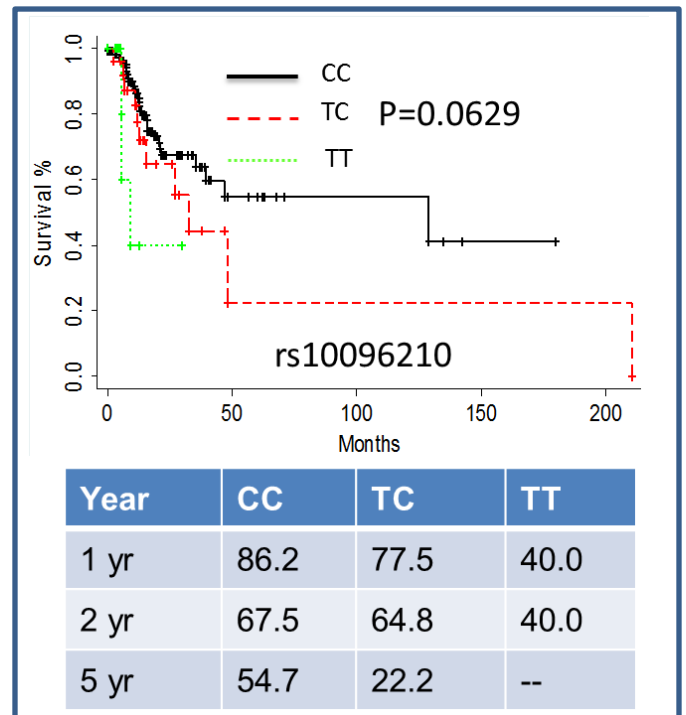

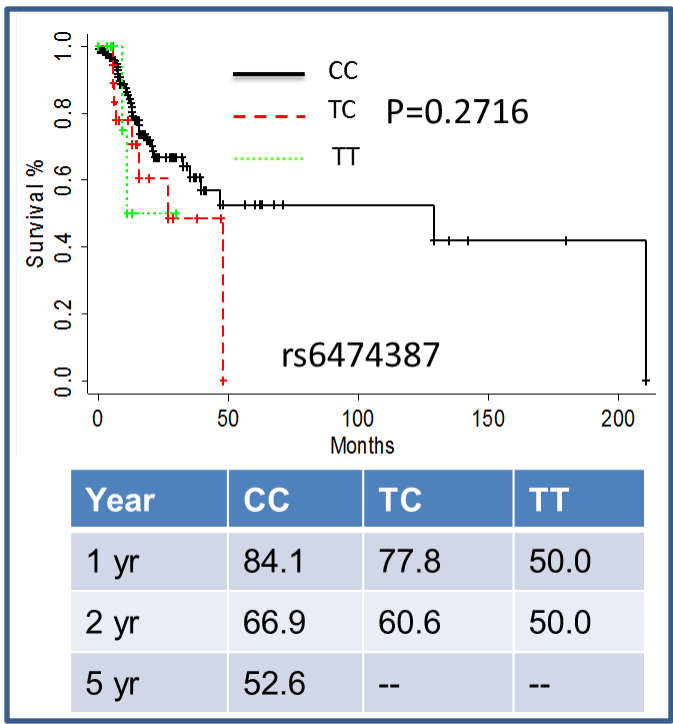

Supplement: NIHMS827555-supplement-Supp_Fig_S3.pdf [file NIHMS827555-supplement-Supp_Fig_S3.pdf]
