# Supplementary material
Source: PubMed Central journal article supplement (PMC5319896)
Supplement: NIHMS827555-supplement-Supp_Table_S1.pdf [file NIHMS827555-supplement-Supp_Table_S1.pdf]

### Supplementary Table 1

P-values obtained for each eQTL based on pooled dataset (Afr-Amr and Caucasian) and only Caucasian patients (Cau) dataset.

| eQTL       | Afr-Amr+Cau | Cau      |
|------------|-------------|----------|
| rs2272733  | 9.81e-07    | 3.78e-06 |
| rs3136790  | 4.33e-07    | 1.32e-06 |
| rs6474387  | 5.68e-05    | 4.00e-05 |
| rs2272732  | 9.28e-07    | 2.37e-07 |
| rs10096210 | 6.25e-07    | 1.26e-06 |
